# Supplementary material for: Direct requirement for Xmus101 in ATR-mediated phosphorylation of Claspin bound Chk1 during checkpoint signaling
Source: PubMed Central journal article supplement — J Cell Biol. 2006 Apr 24;173(2):181–6. doi: 10.1083/jcb.200601076 (PMC2063809; doi:10.1083/jcb.200601076), 2006-04-24
Supplement: jcellbiol_jcb.200601076_2.pdf [file jcellbiol_jcb.200601076_2.pdf]

Yan et al. <http://www.jcb.org/cgi/doi/10.1083/jcb.200601076>

### Supplemental Results

To determine whether Chk1 $\Delta$ kD reliably mimics the endogenous Chk1, we compared the serine 344 phosphorylation status of endogenous Chk1 to Chk1 $\Delta$ kD after checkpoint activation by AT70. Chk1 protein is phosphorylated by ATR on serine 344 (Guo et al., 2000), and antibodies are available that specifically recognize the serine 344-phosphorylated and, hence, activated form of Chk1. As shown in Fig. S1, both endogenous Chk1 (top) and Chk1 $\Delta$ kD (bottom) were phosphorylated on serine 344 in an AT70-dependent manner (compare lanes 3 and 4). Importantly, the ratio of serine 344-phosphorylated Chk1 $\Delta$ kD to total Chk1 $\Delta$ kD (bottom, lanes 4 and 2) was the same in AT70-containing extracts as the corresponding ratio for endogenous Chk1 (top, lanes 4 and 2). This demonstrates that Chk1 $\Delta$ kD is phosphorylated to the same extent as endogenous Chk1 in checkpoint-activated extracts and, therefore, that Chk1 $\Delta$ kD is a reliable surrogate for the endogenous protein.
